# Supplementary material for: Source differences in the components and cytotoxicity of PM 2.5 from automobile exhaust, coal combustion, and biomass burning contributing to urban aerosol toxicity
Source: Copernicus journal article supplement (doi:10.5194/egusphere-2023-598), 2023-04-11
Supplement: Supplementary file 1 [file egusphere-2023-598-supplement.pdf]

# Source differences in the components and cytotoxicity of PM<sub>2.5</sub> from automobile exhaust, coal combustion, and biomass burning contributing to urban aerosol toxicity

5 **Xiao-San Luo<sup>1,#,\*</sup>, Weijie Huang<sup>1,#</sup>, Guofeng Shen<sup>2</sup>, Yuting Pang<sup>1</sup>, Mingwei Tang<sup>1</sup>, Weijun Li<sup>3</sup>,  
Zhen Zhao<sup>1</sup>, Hanhan Li<sup>1</sup>, Yaqian Wei<sup>1</sup>, Longjiao Xie<sup>4</sup>, Tariq Mehmood<sup>5</sup>**

<sup>1</sup>International Center for Ecology, Meteorology, and Environment, School of Applied Meteorology, Nanjing University of Information Science & Technology, Nanjing 210044, China

<sup>2</sup>Laboratory of Earth Surface Processes, College of Urban and Environmental Sciences, Peking University, Beijing 100871, China

10 <sup>3</sup>Department of Atmospheric Sciences, School of Earth Sciences, Zhejiang University, Hangzhou 310027, China

<sup>4</sup>Health Science Center, Peking University, Beijing 100871, China

<sup>5</sup>College of Ecology and Environment, Hainan University, Haikou 570228, China

*Correspondence:* Xiao-San Luo (xsluo@nuist.edu.cn)

#Authors contributed equally to this work

15

There are 19 figures and 3 tables in the Supplement.

## Captions of figures and tables

- 20 **Figure S1.** Schematic of a dilution 4-channel sampler used for collecting PM<sub>2.5</sub> directly from various combustion source emissions.
- Figure S2.** Samples of PM<sub>2.5</sub> loaded in quartz filters collected from 30 typical anthropogenic combustion sources (a: automobile exhaust; b: coal combustion; c: biomass burning).
- Figure S3.** Example of daily urban air PM<sub>2.5</sub> concentrations ( $\mu\text{g m}^{-3}$ ) monitored in Nanjing city, eastern China.
- 25 **Figure S4.** Contents ( $\text{mg kg}^{-1}$ ) and ratio of carbon fractions in PM<sub>2.5</sub> from 10 types of automobile exhaust.
- Figure S5.** Contents ( $\text{mg kg}^{-1}$ ) and ratio of carbon fractions in PM<sub>2.5</sub> from 10 types of coal combustion.
- Figure S6.** Contents ( $\text{mg kg}^{-1}$ ) and ratio of carbon fractions in PM<sub>2.5</sub> from 10 types of biomass burning.
- Figure S7.** Contents ( $\text{mg kg}^{-1}$ ) and ratio of carbon fractions in ambient air PM<sub>2.5</sub> from Nanjing city, eastern China.
- Figure S8.** Heavy metal contents ( $\text{mg kg}^{-1}$ ) in PM<sub>2.5</sub> from 10 types of automobile exhaust.
- 30 **Figure S9.** Heavy metal contents ( $\text{mg kg}^{-1}$ ) in PM<sub>2.5</sub> from 10 types of coal combustion.
- Figure S10.** Heavy metal contents ( $\text{mg kg}^{-1}$ ) in PM<sub>2.5</sub> from 10 types of biomass burning.
- Figure S11.** Heavy metal contents ( $\text{mg kg}^{-1}$ ) in ambient air PM<sub>2.5</sub> from Nanjing city, eastern China.
- Figure S12.** Water-soluble ions (WSIs) contents ( $\text{mg kg}^{-1}$ ) in PM<sub>2.5</sub> from 10 types of automobile exhaust.
- Figure S13.** Water-soluble ions (WSIs) contents ( $\text{mg kg}^{-1}$ ) in PM<sub>2.5</sub> from 10 types of coal combustion.
- 35 **Figure S14.** Water-soluble ions (WSIs) contents ( $\text{mg kg}^{-1}$ ) in PM<sub>2.5</sub> from 10 types of biomass burning.
- Figure S15.** Water-soluble ions (WSIs) contents ( $\text{mg kg}^{-1}$ ) in monthly ambient air PM<sub>2.5</sub> from Nanjing city, eastern China.
- Figure S16.** Cell viability, oxidative stress and inflammation levels exposed to PM<sub>2.5</sub> from 10 types of automobile exhaust.
- Figure S17.** Cell viability, oxidative stress and inflammation levels exposed to PM<sub>2.5</sub> from 10 types of coal combustion.
- Figure S18.** Cell viability, oxidative stress and inflammation levels exposed to PM<sub>2.5</sub> from 10 types of biomass burning.
- 40 **Figure S19.** Cell viability, oxidative stress and inflammation levels exposed to various ambient air PM<sub>2.5</sub> from Nanjing city, eastern China.
- Table S1.** Characteristics of the investigated typical vehicles.
- 45 **Table S2.** Characteristic analysis of typical coal samples.
- Table S3.** Characteristic analysis of typical biomass fuel samples.

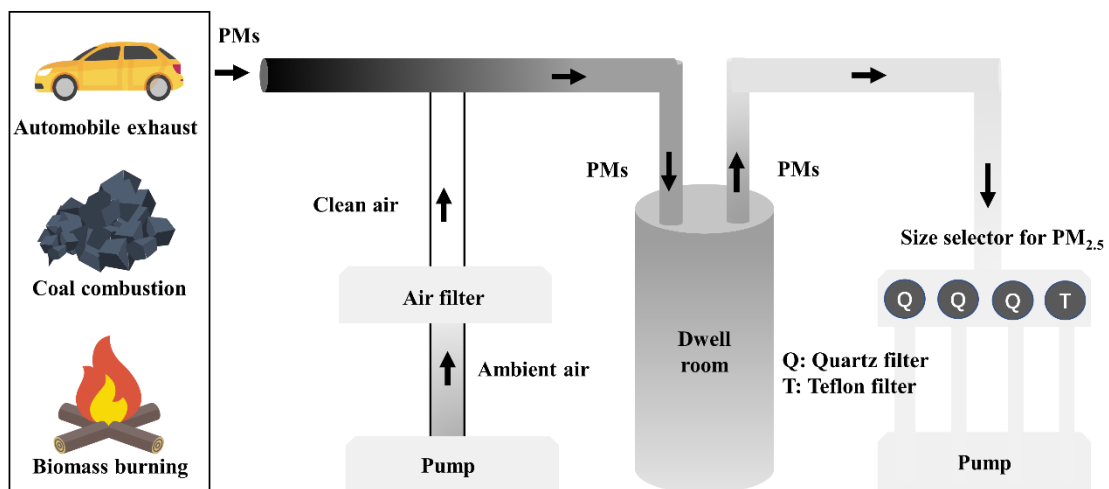

50

**Figure S1.** Schematic of a dilution 4-channel sampler used for collecting PM<sub>2.5</sub> directly from various combustion source emissions.

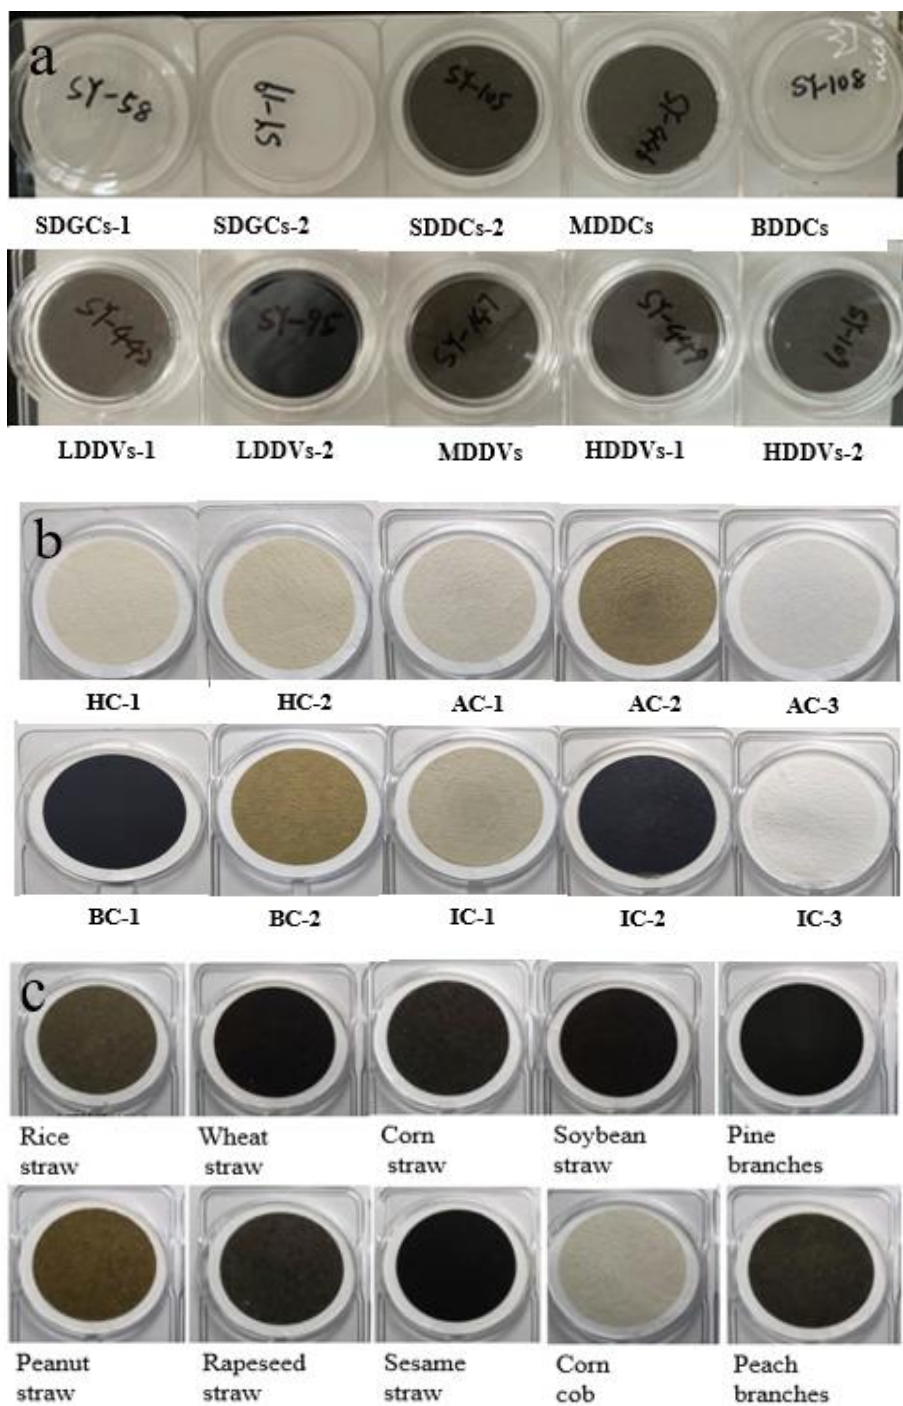

55

**Figure S2.** Samples of PM<sub>2.5</sub> loaded in quartz filters collected from 30 typical anthropogenic combustion sources (a: automobile exhaust; b: coal combustion; c: biomass burning).

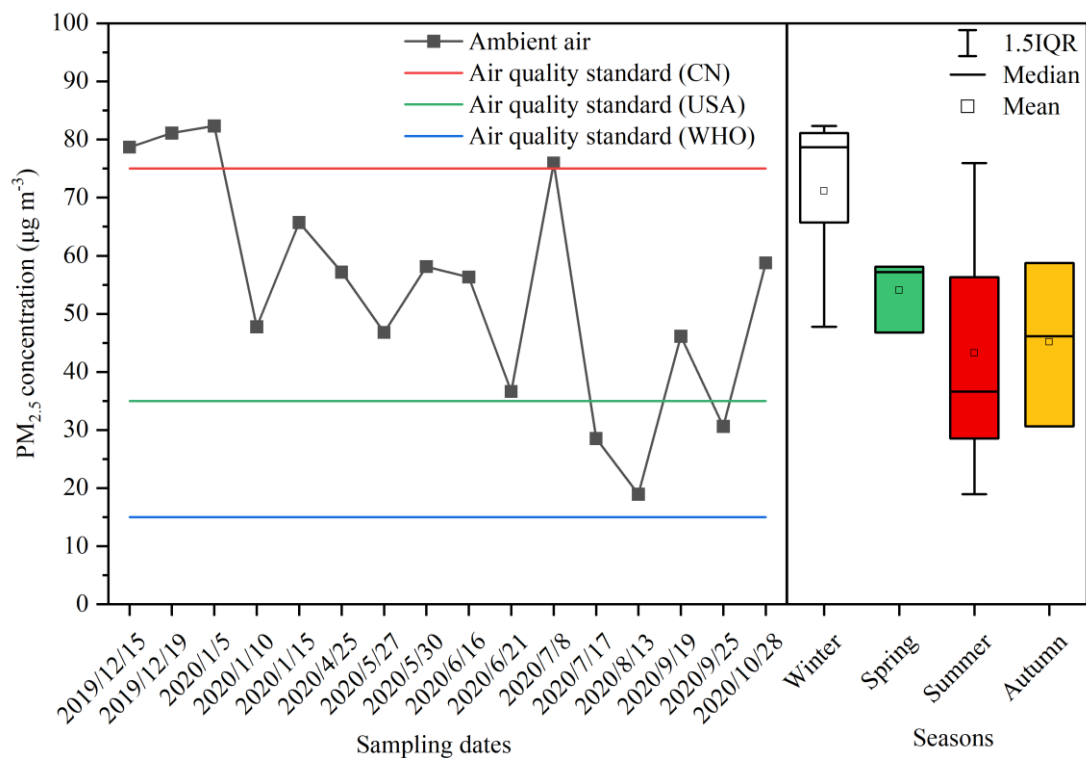

60

**Figure S3.** Example of daily urban air PM<sub>2.5</sub> concentrations (µg m<sup>-3</sup>) monitored in Nanjing city, eastern China.

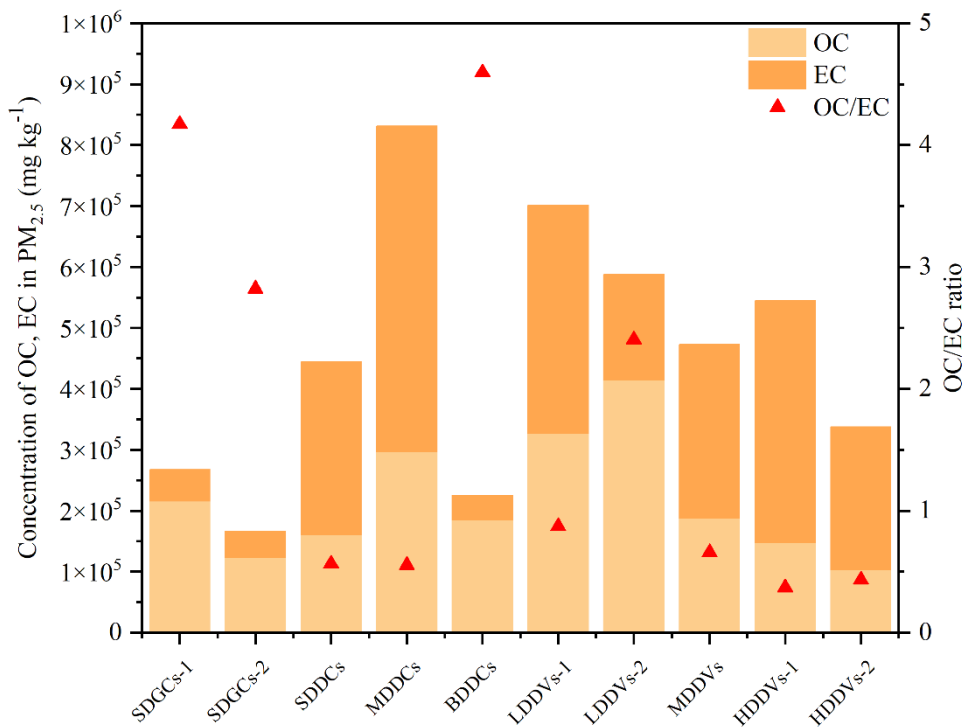

**Figure S4.** Contents ( $\text{mg kg}^{-1}$ ) and ratio of carbon fractions in  $\text{PM}_{2.5}$  from 10 types of automobile exhaust.

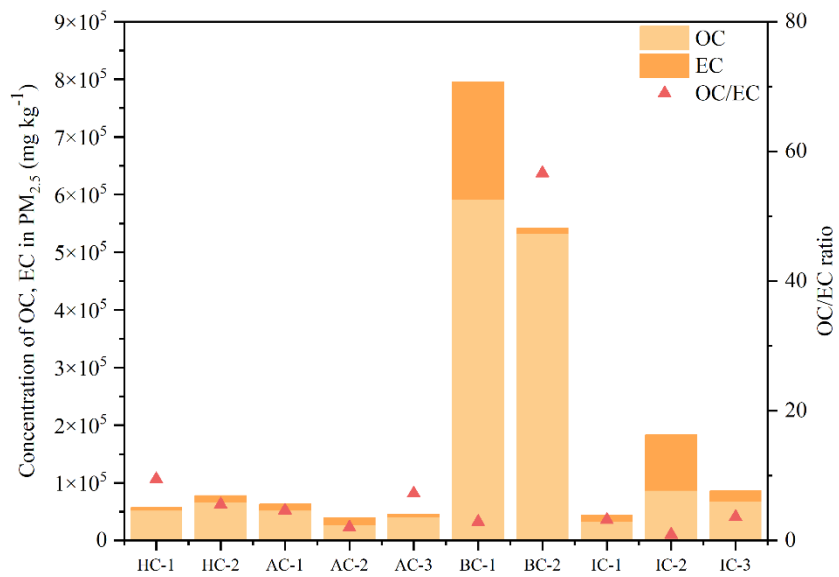

65

**Figure S5.** Contents ( $\text{mg kg}^{-1}$ ) and ratio of carbon fractions in  $\text{PM}_{2.5}$  from 10 types of coal combustion.

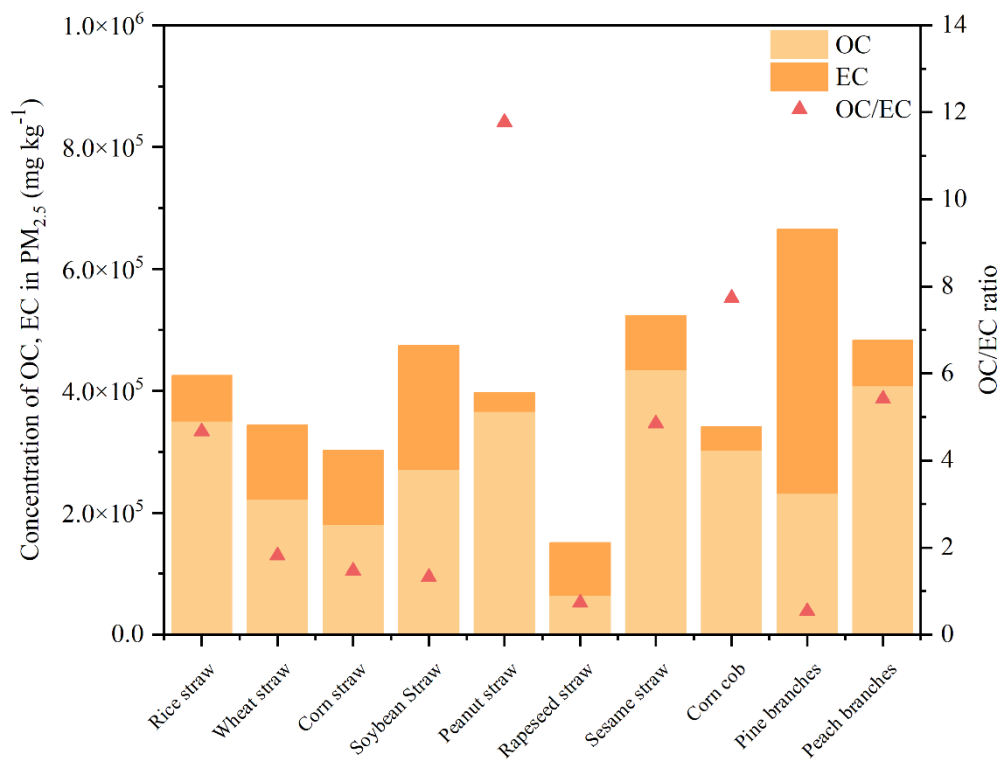

**Figure S6.** Contents ( $\text{mg kg}^{-1}$ ) and ratio of carbon fractions in  $\text{PM}_{2.5}$  from 10 types of biomass burning.



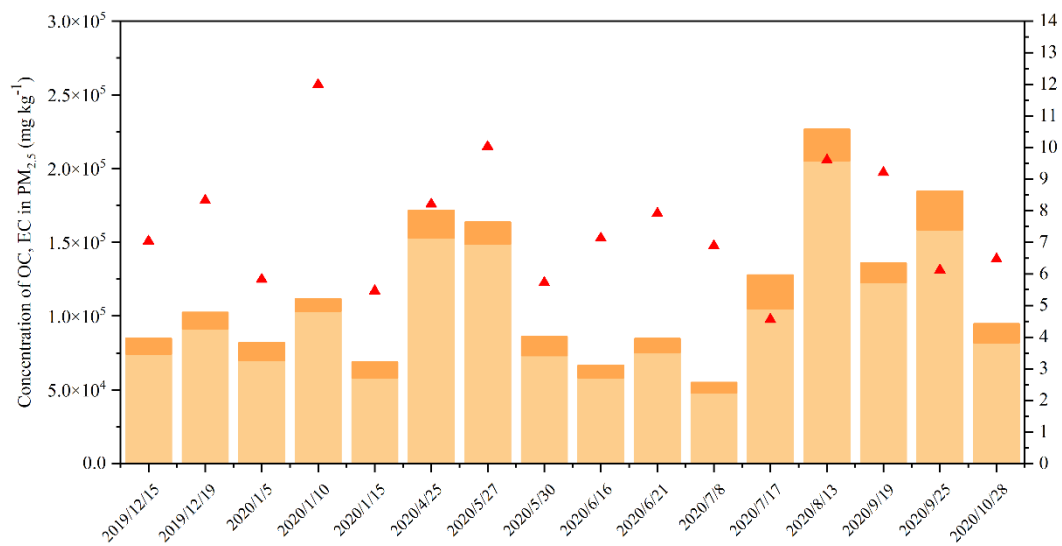

**Figure S7.** Contents ( $\text{mg kg}^{-1}$ ) and ratio of carbon fractions in ambient air  $\text{PM}_{2.5}$  from Nanjing city, eastern China.

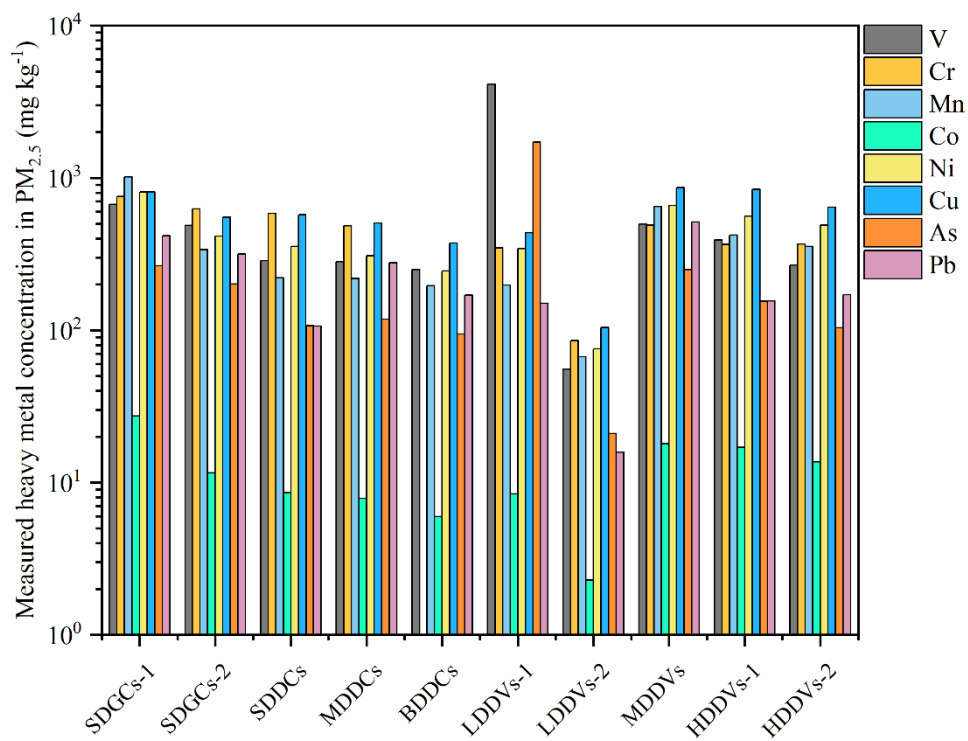

**Figure S8.** Heavy metal contents ( $\text{mg kg}^{-1}$ ) in  $\text{PM}_{2.5}$  from 10 types of automobile exhaust.

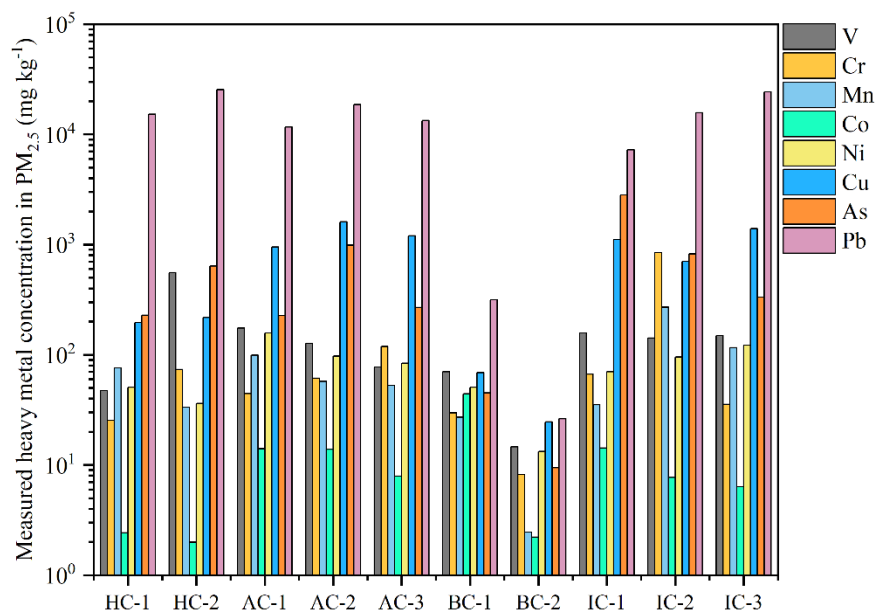

75

**Figure S9.** Heavy metal contents ( $mg\ kg^{-1}$ ) in  $PM_{2.5}$  from 10 types of coal combustion.

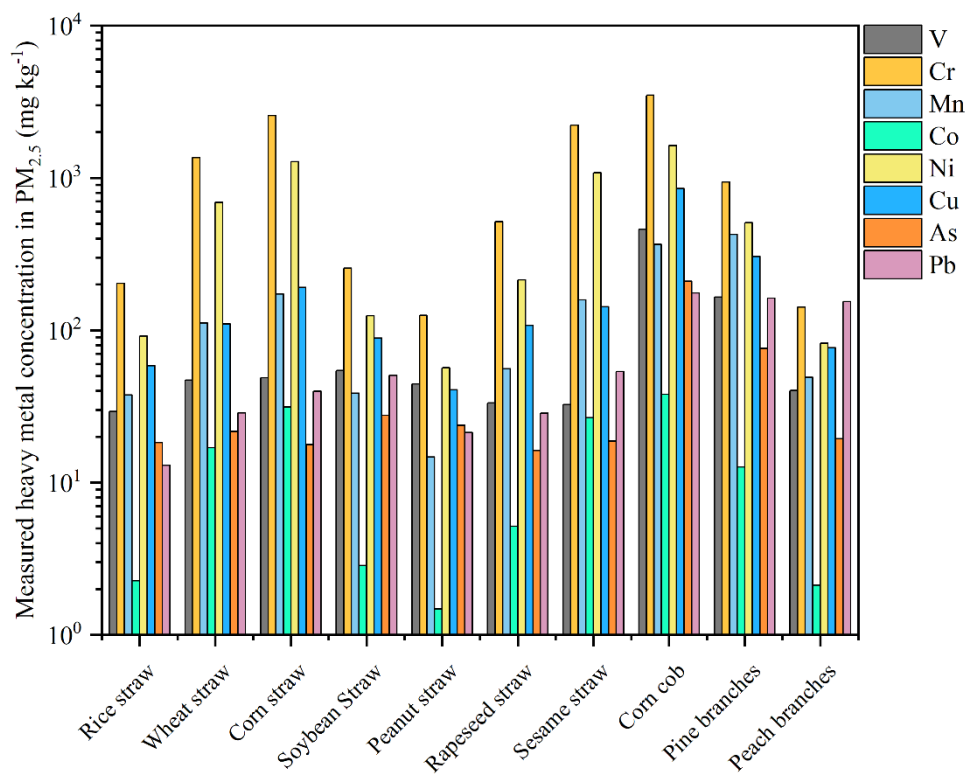

**Figure S10.** Heavy metal contents (mg kg<sup>-1</sup>) in PM<sub>2.5</sub> from 10 types of biomass burning.

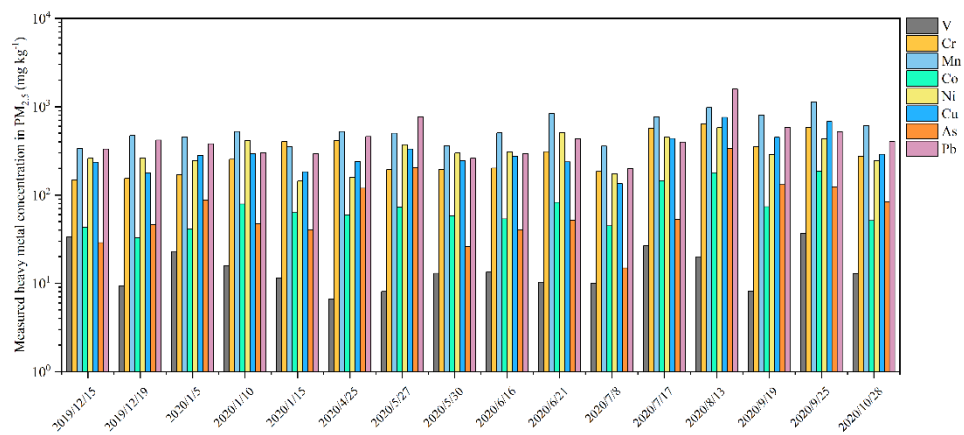

**Figure S11.** Heavy metal contents ( $\text{mg kg}^{-1}$ ) in monthly ambient air  $\text{PM}_{2.5}$  from Nanjing city, eastern China.

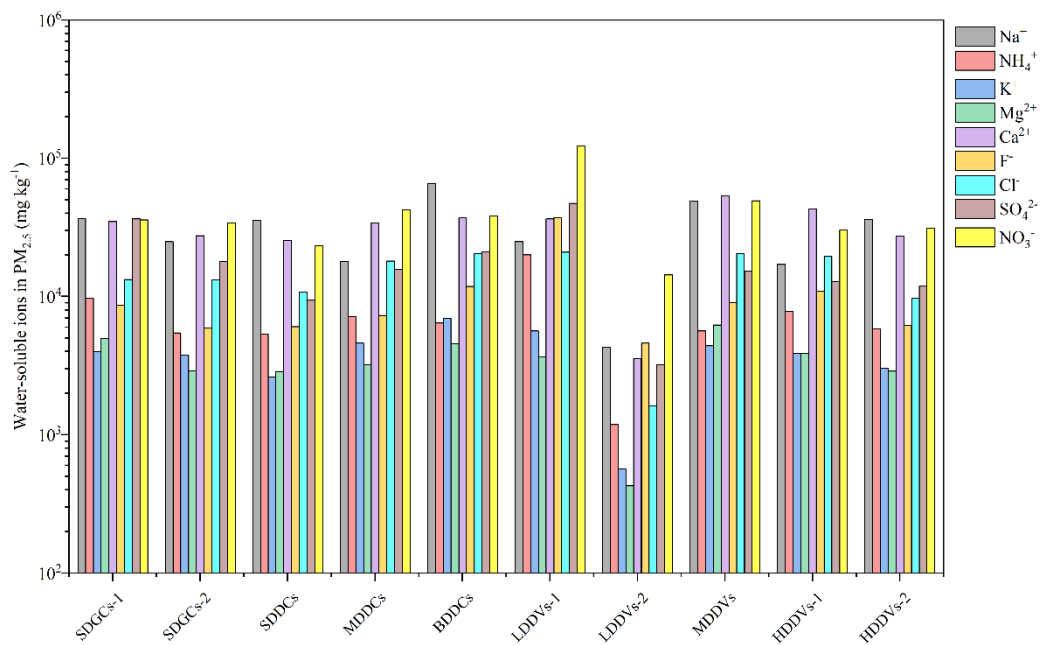

85

**Figure S12.** Water-soluble ions (WIS) contents ( $mg\ kg^{-1}$ ) in  $PM_{2.5}$  from 10 types of automobile exhaust.

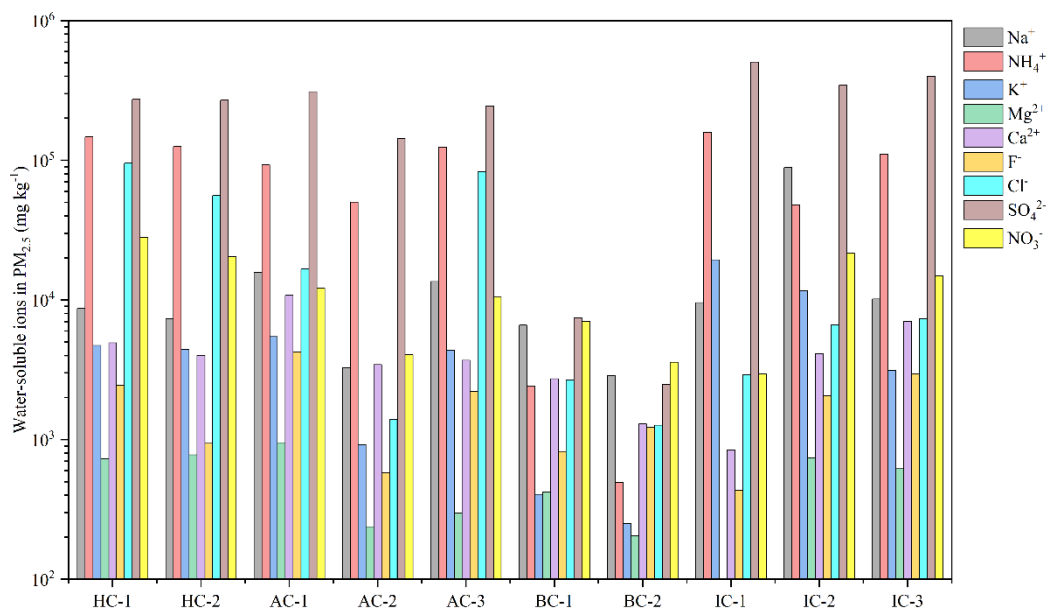

90 **Figure S13.** Water-soluble ions (WSIs) contents ( $\text{mg kg}^{-1}$ ) in  $\text{PM}_{2.5}$  from 10 types of coal combustion.

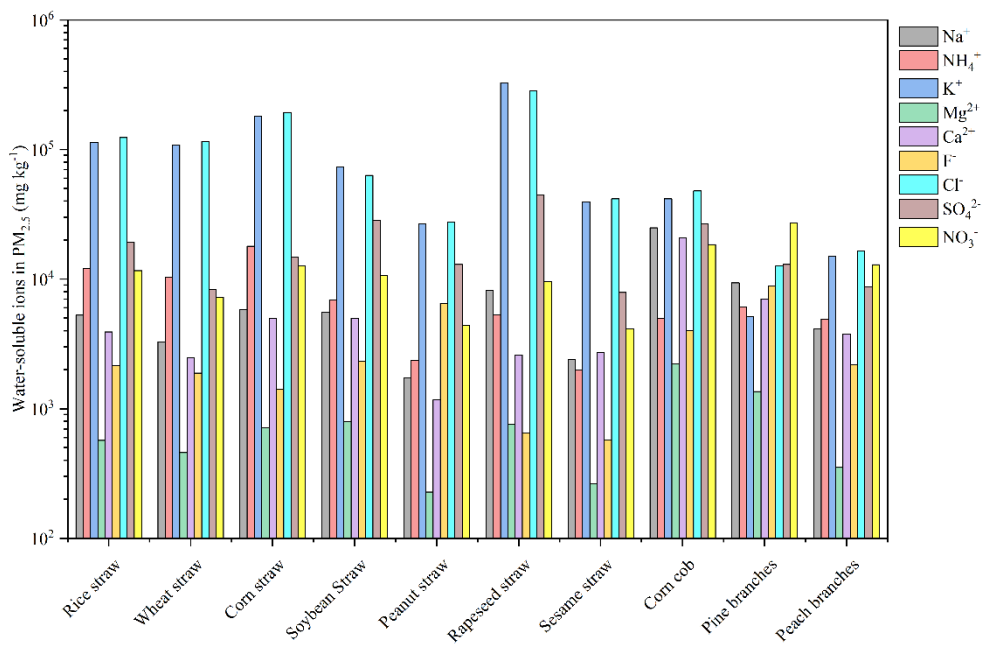

**Figure S14.** Water-soluble ions (WSIs) contents (mg kg<sup>-1</sup>) in PM<sub>2.5</sub> from 10 types of biomass burning.



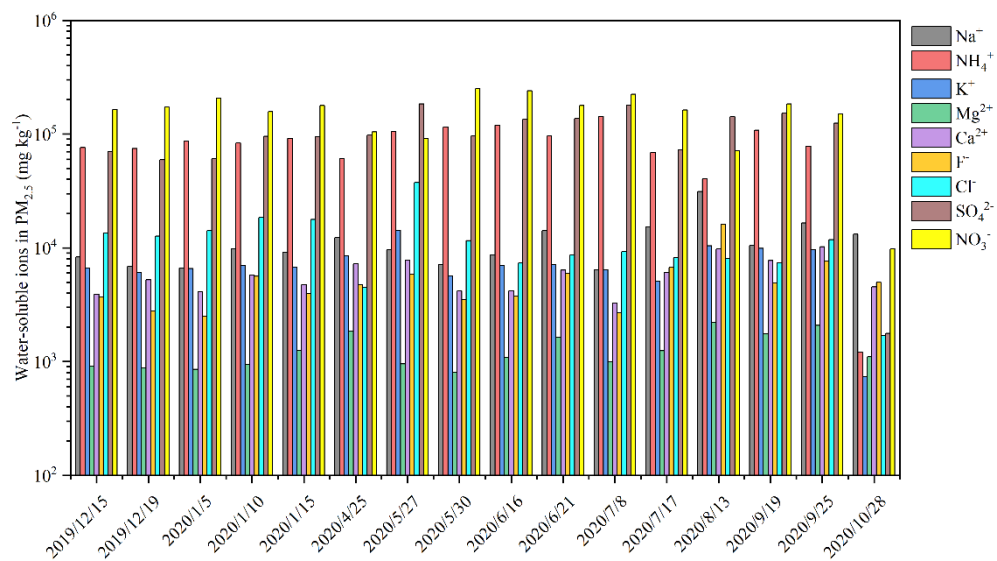

**Figure S15.** Water-soluble ions (WSIs) contents ( $\text{mg kg}^{-1}$ ) in ambient air  $\text{PM}_{2.5}$  from Nanjing city, eastern China.

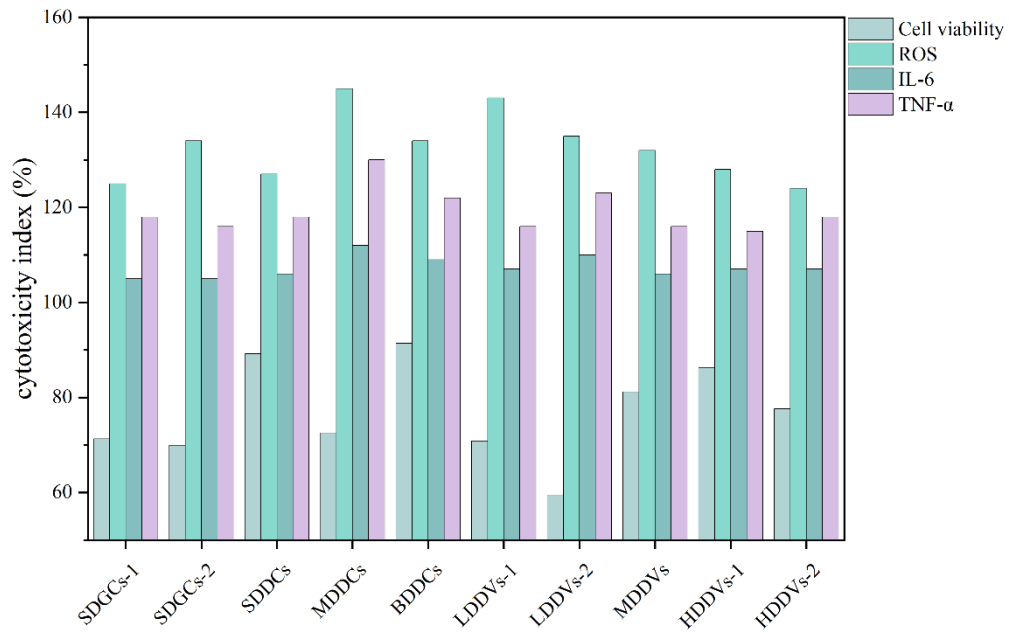

**Figure S16.** Cell viability, oxidative stress and inflammation levels exposed to PM<sub>2.5</sub> from 10 types of automobile exhaust.

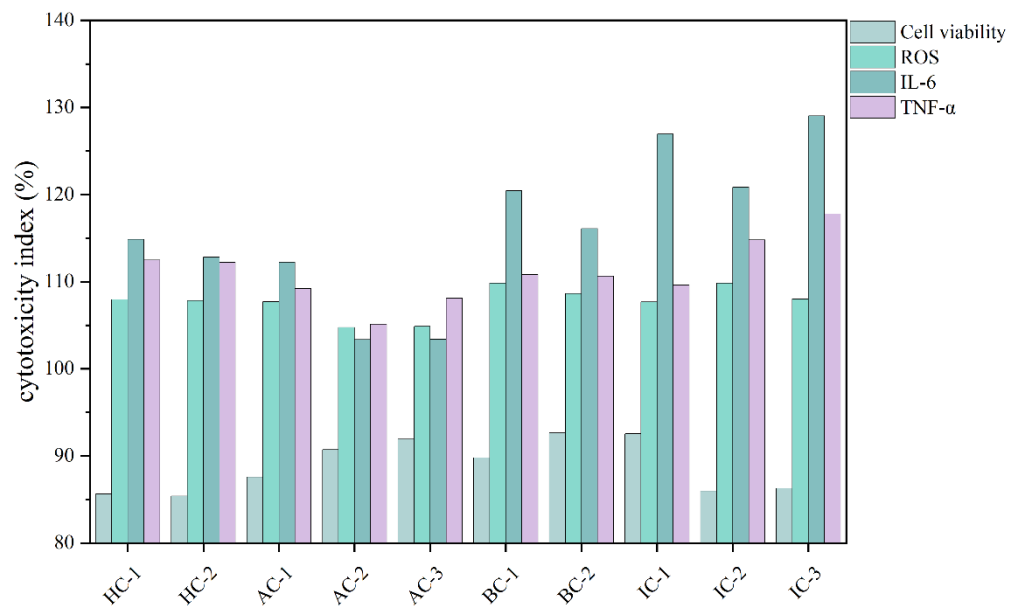

**Figure S17.** Cell viability, oxidative stress and inflammation levels exposed to PM<sub>2.5</sub> from 10 types of coal combustion.

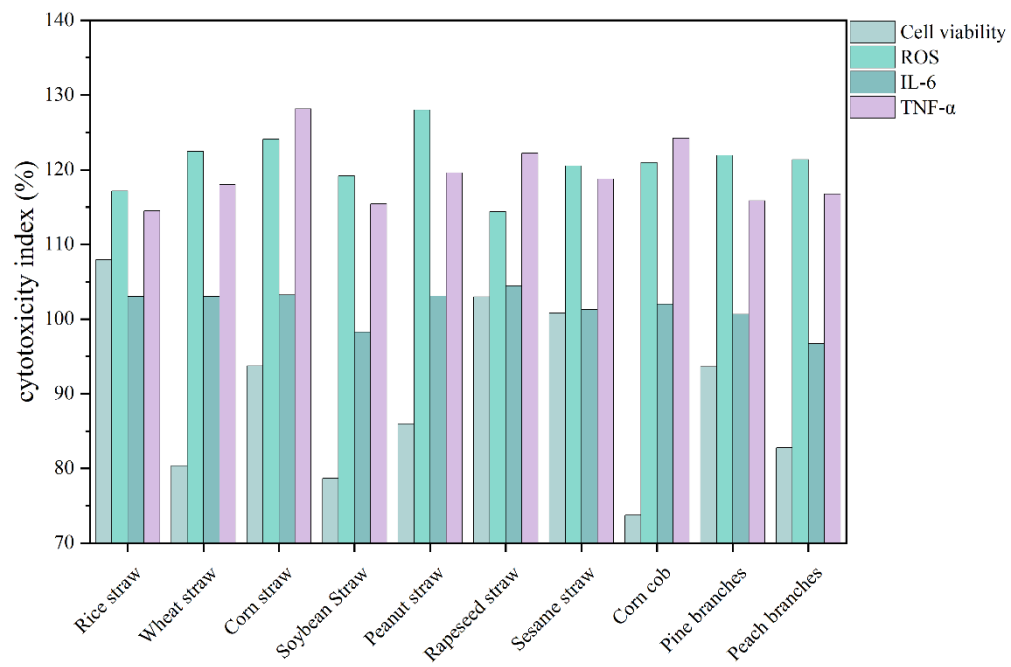

**Figure S18.** Cell viability, oxidative stress and inflammation levels exposed to PM<sub>2.5</sub> from 10 types of biomass burning.

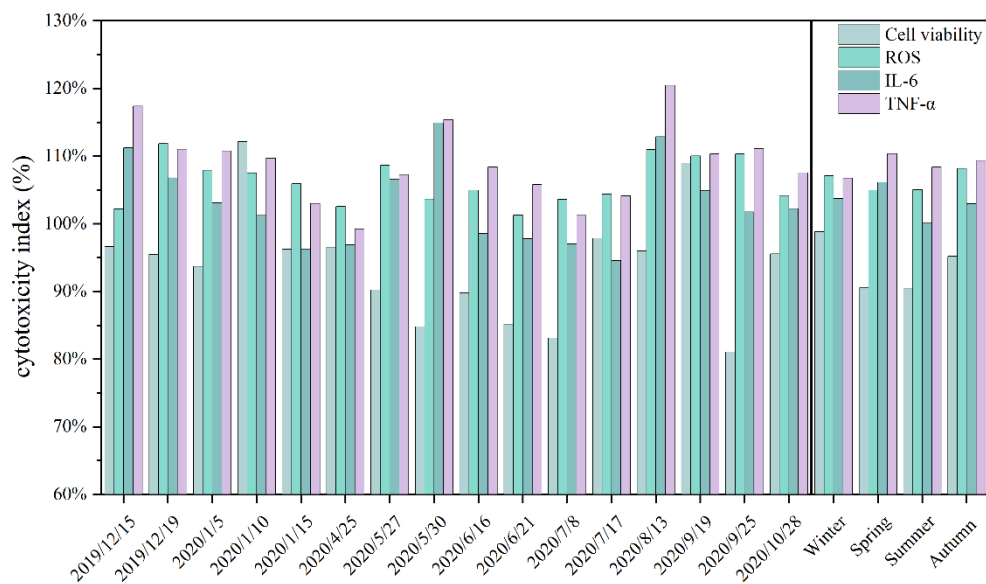

**Figure S19.** Cell viability, oxidative stress and inflammation levels exposed to various ambient air PM<sub>2.5</sub> from Nanjing city, eastern China.

**Table S1.** Characteristics of the investigated typical vehicles.

| <b>No.</b> | <b>Abbreviations</b> | <b>Vehicle types</b>      | <b>Manufacture year</b> | <b>Emission standards</b> | <b>Fuel type</b> | <b>Weight (kg)</b> |
|------------|----------------------|---------------------------|-------------------------|---------------------------|------------------|--------------------|
| #1         | SDGCs-1              | Small duty gasoline coach | 2015                    | CN.V                      | CN.92#           | 1970               |
| #2         | SDGCs-2              | Small duty gasoline coach | 2019                    | CN.VI                     | CN.92#           | 2110               |
| #3         | SDDCs                | Small duty diesel coach   | lost                    | CN.IV                     | CN.5#            | 1790               |
| #4         | MDDCs                | Middle duty diesel coach  | 2009                    | CN.IV                     | CN.5#            | 3600               |
| #5         | BDDCs                | Big duty diesel coach     | 2015                    | CN.V                      | CN.5#            | 15800              |
| #6         | LDDVs-1              | Light duty diesel van     | 2009                    | CN.III                    | CN.5#            | 3970               |
| #7         | LDDVs-2              | Light duty diesel van     | 2015                    | CN.IV                     | CN.5#            | 4500               |
| #8         | MDDVs                | Middle duty diesel van    | 2014                    | CN.IV                     | CN.5#            | 7320               |
| #9         | HDDVs-1              | Heavy duty diesel van     | 2015                    | CN.IV                     | CN.5#            | 29080              |
| #10        | HDDVs-2              | Heavy duty diesel van     | 2019                    | CN.V                      | CN.5#            | 40000              |

**Table S2.** Characteristic analysis of typical coal samples.

| Coal types | $M_{ad}$ (%) | $A_{ad}$ (%) | $V_{ad}$ (%) | $FC_{ad}$ (%) | Origin                                             |
|------------|--------------|--------------|--------------|---------------|----------------------------------------------------|
| HC-1       | 1.87         | 46.2         | 9.87         | 42.1          | Nanjing city                                       |
| HC-2       | 2.15         | 49.3         | 9.63         | 38.9          | Nanjing city                                       |
| AC-1       | 1.26         | 10.2         | 10.6         | 78.0          | Ningxia province                                   |
| AC-2       | 1.19         | 12.5         | 10.8         | 75.5          | Anhui province                                     |
| AC-3       | 1.76         | 6.78         | 8.99         | 82.5          | Shanxi province                                    |
| BC-1       | 5.23         | 1.84         | 41.5         | 51.5          | Inner Mongolia province                            |
| BC-2       | 7.06         | 5.07         | 29.8         | 58.0          | Henan province                                     |
| IC-1       | 0.43         | 13.0         | 1.63         | 85.0          | Nanjing Iron & Steel Co.                           |
| IC-2       | 1.74         | 11.1         | 30.3         | 56.9          | China Resources Jiangsu Nanre Power Generation Co. |
| IC-3       | 4.37         | 8.17         | 30.9         | 56.5          | Huaneng Nanjing Jinling Power Generation Co.       |

Note:  $M_{ad}$  is the moisture mass fraction of the sample on an air-dried basis;  $A_{ad}$  is the ash mass fraction of the sample on an air-dried basis;  $V_{ad}$  is volatile matter mass fraction of sample on dry air-dried basis;  $FC_{ad}$  is fixed carbon fraction of the sample on an air-dried basis;  $FC_{ad} = 1 - M_{ad} - A_{ad} - V_{ad}$ .

**Table S3.** Characteristic analysis of typical biomass fuel samples.

| Biomass types  | M <sub>ad</sub> (%) | A <sub>ad</sub> (%) | V <sub>ad</sub> (%) | FC <sub>ad</sub> (%) |
|----------------|---------------------|---------------------|---------------------|----------------------|
| Rice straw     | 10.8                | 14.6                | 59.8                | 14.9                 |
| Wheat straw    | 12.1                | 5.65                | 65.5                | 16.8                 |
| Corn straw     | 11.6                | 4.22                | 66.1                | 18.1                 |
| Soybean Straw  | 11.0                | 4.62                | 68.4                | 16.0                 |
| Peanut straw   | 15.0                | 10.8                | 61.4                | 12.8                 |
| Rape straw     | 11.1                | 2.95                | 68.8                | 17.1                 |
| Sesame straw   | 13.1                | 7.64                | 63.7                | 15.5                 |
| Corn cob       | 9.21                | 0.66                | 73.5                | 16.7                 |
| Pine branches  | 13.4                | 0.33                | 66.6                | 19.7                 |
| Peach branches | 9.94                | 0.65                | 73.4                | 16.0                 |

130 Note: M<sub>ad</sub> is the moisture mass fraction of the sample on an air-dried basis; A<sub>ad</sub> is the ash mass fraction of the sample on an air-dried basis; V<sub>ad</sub> is volatile matter mass fraction of sample on dry air-dried basis; FC<sub>ad</sub> is fixed carbon fraction of the sample on an air-dried basis; FC<sub>ad</sub> = 1 - M<sub>ad</sub> - A<sub>ad</sub> - V<sub>ad</sub>.
